# Supplementary material
Source: PubMed Central journal article supplement (PMC3957793)
Supplement: JCM.02799-13_zjm999093202so2.pdf [file JCM.02799-13_zjm999093202so2.pdf]

Supplemental Table S1. Novel PCR primers used in the present study

| Antimicrobial resistance gene target | Primer name      | Nucleotide sequence (5'-3')                              | Product size (bp) | Genbank accession no. |
|--------------------------------------|------------------|----------------------------------------------------------|-------------------|-----------------------|
| <i>qacC</i>                          | qacCF<br>qacCR   | CCATACCGATTTCAATGATTCCTT<br>GCATGATGAAGCTGTAAGGC         | 525               | Y16944.1              |
| <i>msr(A)</i>                        | msrAF<br>msrAR   | GCACTTATTGGAGGTAATGGTACTGGC<br>TGACGTTGTTGTTCTAACTGTTCTT | 503               | AB013298.1            |
| <i>dfpS1</i>                         | dfpS1F<br>dfpS1R | GTCGCTCACGATAAACAAAGAGT<br>TACGTCTATTTGGCAATGGCTTCCC     | 160               | AB049452.1            |
| <i>lnu(A)</i>                        | lnuAF<br>lnuAR   | AAGTTGAGCTTCTTTGGAAATGC<br>ACTCATTGGTTAGATGGAGGC         | 345               | AM184101.1            |
| <i>mph(C)</i>                        | mphCF<br>mphCR   | ATCAATTACACATCCAACCTCAAAC<br>CGAGTGTTTCAGCTAATGTGTTAAT   | 348               | AB013298.1            |
| <i>blaZ</i>                          | blaZF<br>blaZR   | TTCAAACAGTTCACATGCCAAAGAG<br>AGAACCGTTTGCTGTATTATCAC     | 384               | AB074882.1            |

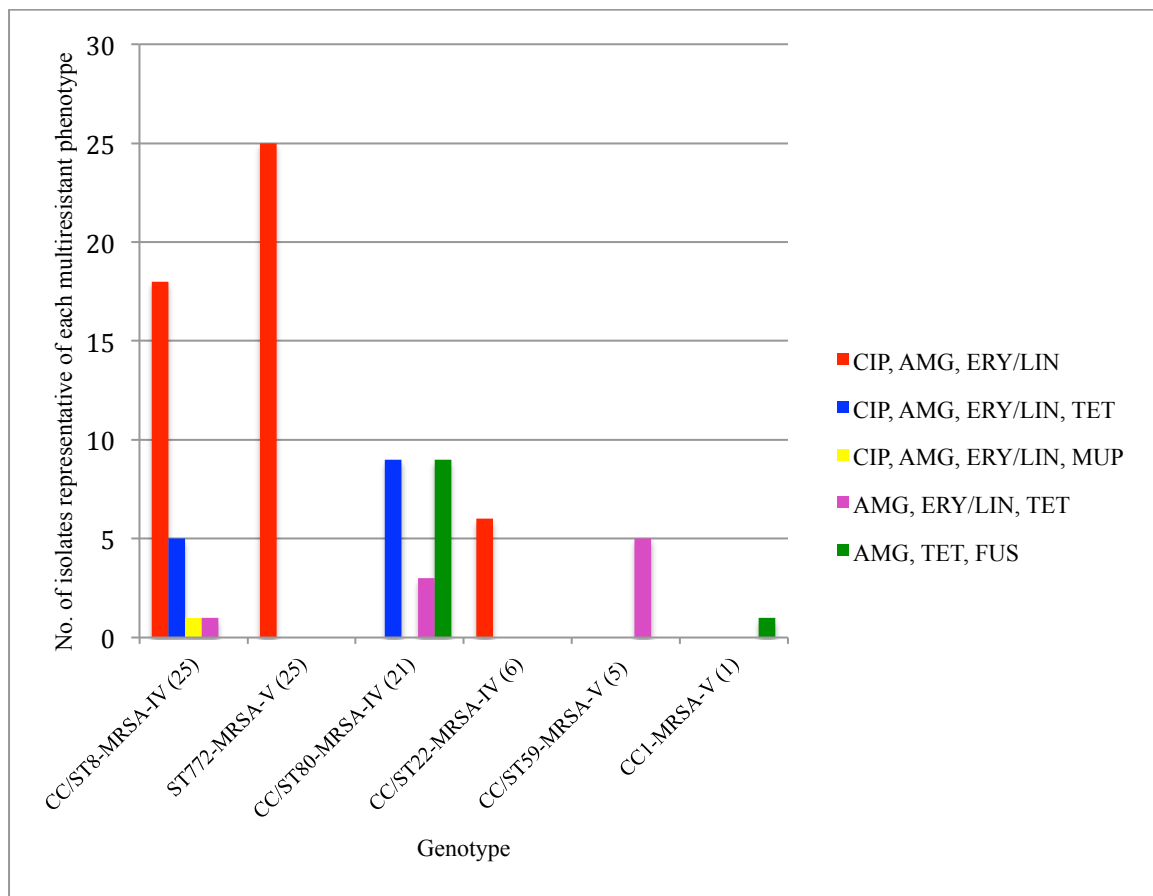

Supplemental Fig. S1. Multiresistant phenotypes detected among *pvl*-positive MRSA. Eighty-three of the 190 *pvl*-positive MRSA isolates exhibited multiresistance (43.7%) i.e. exhibited resistance to three or more classes of clinically used antimicrobial agents tested including fluoroquinolones (ciprofloxacin, CIP), aminoglycosides (AMG), erythromycin/lincomycin (ERY/LIN), tetracycline (TET), mupirocin (MUP) and fusidic acid (FUS). Numbers (*n*) in parenthesis indicate the number of multiresistant isolates within each genotype.

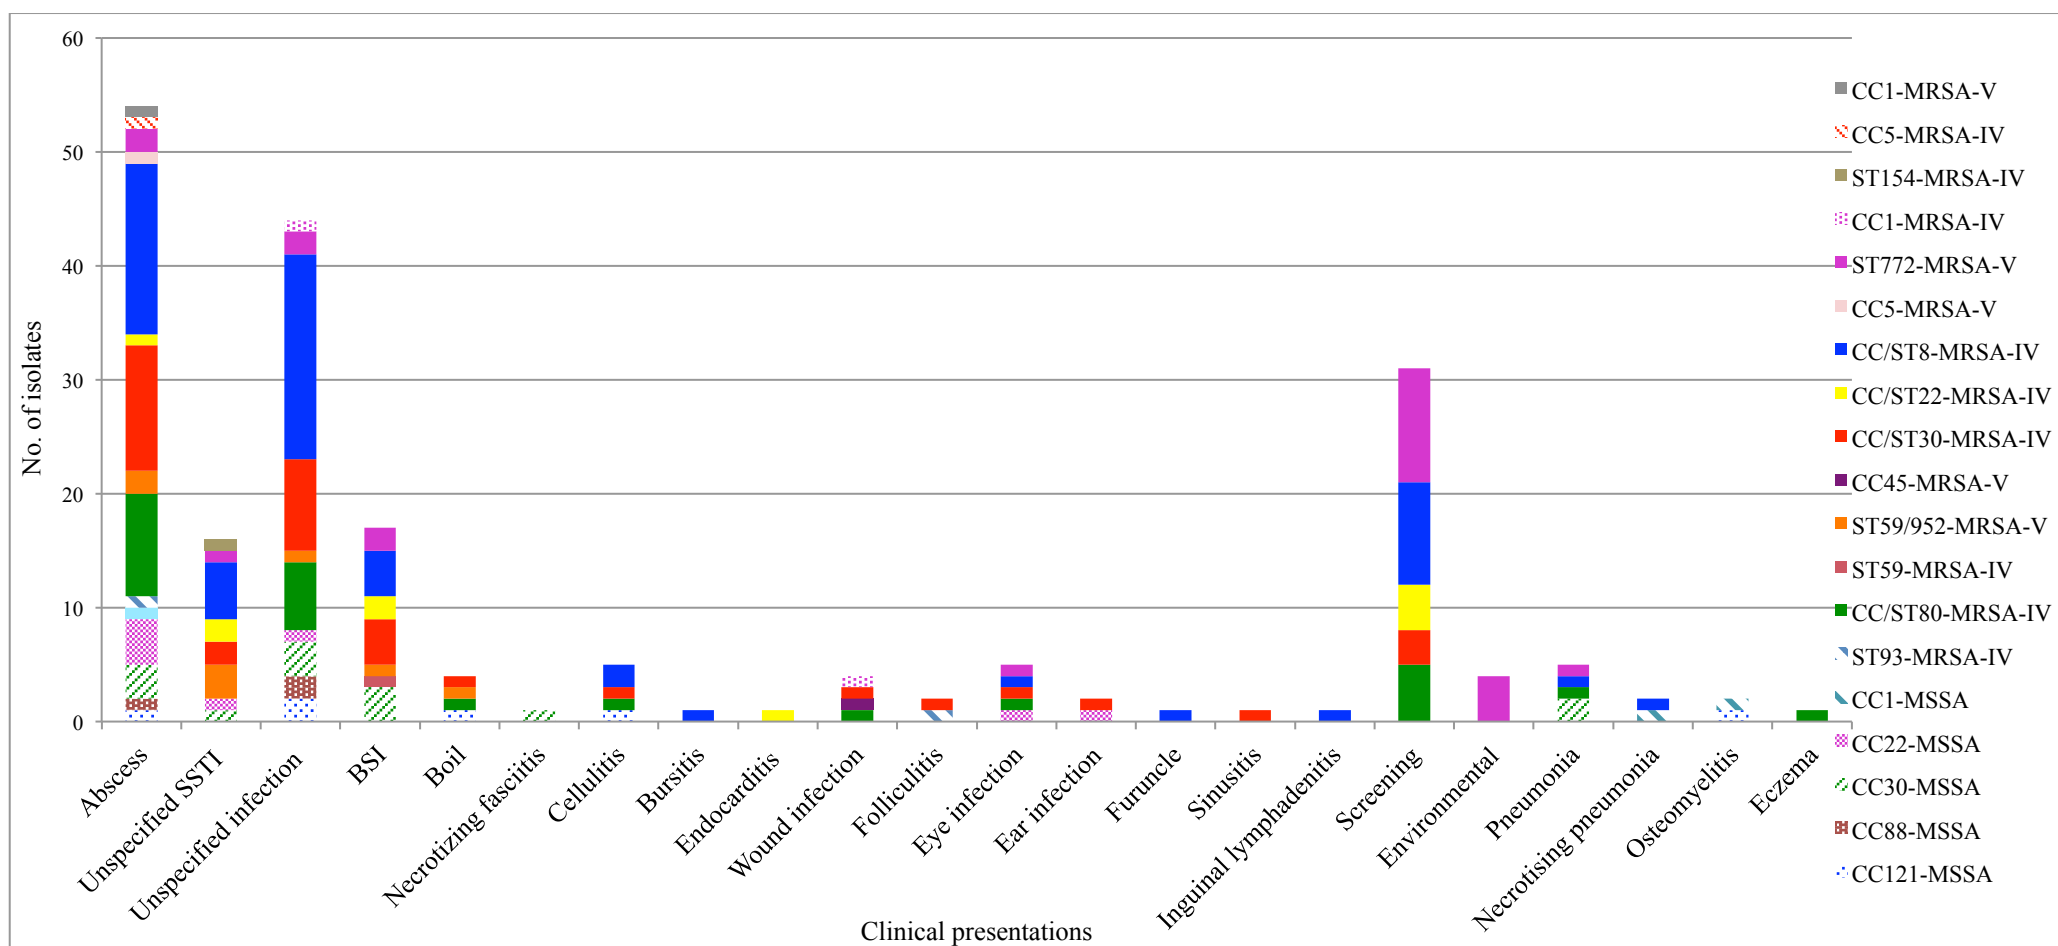

Supplemental Fig. S2. Clinical details for each genotype identified among the *pvl*-positive MRSA and MSSA isolates investigated. Clinical details were available for 170 MRSA and 32 MSSA isolates. Abbreviations: SSTI, skin and soft tissue infection; BSI, bloodstream infection.
